# Supplementary material for: Discovery and Heterologous Expression of Unspecific Peroxygenases
Source: MDPI journal article supplement (doi:10.3390/catal13010206), 2023-01-16
Supplement: s1 [file s1]

Archive with 1 entries (1 files):
- catalysts-2108439-supplementary.pdf
